# Supplementary material for: The Change in the Content of Nutrients in Diets Eliminating Products of Animal Origin in Comparison to a Regular Diet from the Area of Middle-Eastern Europe
Source: PubMed Central journal article supplement (PMC7599827; doi:10.3390/nu12102986), 2020-09-29
Supplement: nutrients-12-02986-s001.pdf [file nutrients-12-02986-s001.pdf]

Table S1. Differences in mineral content

| <b>SODIUM</b>     | MFD             | FFD             | BD              | RD              | LOV             | VEGAN           | PV              |
|-------------------|-----------------|-----------------|-----------------|-----------------|-----------------|-----------------|-----------------|
| MFD               | -               | 0.1758          | 0.3203          | < <b>0.0001</b> | 0.1795          | 0.2795          | 0.1918          |
| FFD               | 0.1758          | -               | 0.7145          | < <b>0.0001</b> | 0.9907          | <b>0.0167</b>   | 0.9604          |
| BD                | 0.3203          | 0.7145          | -               | < <b>0.0001</b> | 0.7232          | <b>0.0404</b>   | 0.7518          |
| RD                | < <b>0.0001</b> | < <b>0.0001</b> | < <b>0.0001</b> | -               | < <b>0.0001</b> | < <b>0.0001</b> | < <b>0.0001</b> |
| LOV               | 0.1795          | 0.9907          | 0.7232          | < <b>0.0001</b> | -               | <b>0.0172</b>   | 0.9698          |
| VEGAN             | 0.2795          | <b>0.0167</b>   | <b>0.0404</b>   | < <b>0.0001</b> | <b>0.0172</b>   | -               | <b>0.0189</b>   |
| PV                | 0.1918          | 0.9604          | 0.7518          | < <b>0.0001</b> | 0.9698          | <b>0.0189</b>   | -               |
| <b>POTASSIUM</b>  | MFD             | FFD             | BD              | RD              | LOV             | VEGAN           | PV              |
| MFD               | -               | 0.7795          | 0.8219          | < <b>0.0001</b> | 0.3288          | 0.8530          | 0.3546          |
| FFD               | 0.7795          | -               | 0.6138          | < <b>0.0001</b> | 0.4846          | 0.6420          | 0.5171          |
| BD                | 0.8219          | 0.6138          | -               | < <b>0.0001</b> | 0.2307          | 0.9682          | 0.2509          |
| RD                | < <b>0.0001</b> | < <b>0.0001</b> | < <b>0.0001</b> | -               | < <b>0.0001</b> | < <b>0.0001</b> | < <b>0.0001</b> |
| LOV               | 0.3288          | 0.4846          | 0.2307          | < <b>0.0001</b> | -               | 0.2463          | 0.9591          |
| VEGAN             | 0.8530          | 0.6420          | 0.9682          | < <b>0.0001</b> | 0.2463          | -               | 0.2675          |
| PV                | 0.3546          | 0.5171          | 0.2509          | < <b>0.0001</b> | 0.9591          | 0.2675          | -               |
| <b>CALCIUM</b>    | MFD             | FFD             | BD              | RD              | LOV             | VEGAN           | PV              |
| MFD               | -               | < <b>0.0001</b> | < <b>0.0001</b> | 0.9349          | < <b>0.0001</b> | 0.1227          | < <b>0.0001</b> |
| FFD               | < <b>0.0001</b> | -               | 0.2687          | < <b>0.0001</b> | 0.4228          | < <b>0.0001</b> | 0.4361          |
| BD                | < <b>0.0001</b> | 0.2687          | -               | < <b>0.0001</b> | 0.0590          | < <b>0.0001</b> | 0.0621          |
| RD                | 0.9349          | < <b>0.0001</b> | < <b>0.0001</b> | -               | < <b>0.0001</b> | 0.1046          | < <b>0.0001</b> |
| LOV               | < <b>0.0001</b> | 0.4228          | 0.0590          | < <b>0.0001</b> | -               | < <b>0.0001</b> | 0.9816          |
| VEGAN             | 0.1227          | < <b>0.0001</b> | < <b>0.0001</b> | 0.1046          | < <b>0.0001</b> | -               | < <b>0.0001</b> |
| PV                | < <b>0.0001</b> | 0.4361          | 0.0621          | < <b>0.0001</b> | 0.9816          | < <b>0.0001</b> | -               |
| <b>PHOSPHORUS</b> | MFD             | FFD             | BD              | RD              | LOV             | VEGAN           | PV              |
| MFD               | -               | <b>0.0100</b>   | <b>0.0128</b>   | < <b>0.0001</b> | <b>0.0284</b>   | 0.4192          | <b>0.0284</b>   |
| FFD               | <b>0.0100</b>   | -               | 0.9273          | < <b>0.0001</b> | 0.6814          | <b>0.0009</b>   | 0.6814          |
| BD                | <b>0.0128</b>   | 0.9273          | -               | < <b>0.0001</b> | 0.7494          | <b>0.0013</b>   | 0.7494          |
| RD                | < <b>0.0001</b> | < <b>0.0001</b> | < <b>0.0001</b> | -               | < <b>0.0001</b> | < <b>0.0001</b> | < <b>0.0001</b> |
| LOV               | <b>0.0284</b>   | 0.6814          | 0.7494          | < <b>0.0001</b> | -               | <b>0.0033</b>   | >0.9999         |
| VEGAN             | 0.4192          | <b>0.0009</b>   | <b>0.0013</b>   | < <b>0.0001</b> | <b>0.0033</b>   | -               | <b>0.0033</b>   |
| PV                | <b>0.0284</b>   | 0.6814          | 0.7494          | < <b>0.0001</b> | >0.9999         | <b>0.0033</b>   | -               |
| <b>MAGNESIUM</b>  | MFD             | FFD             | BD              | RD              | LOV             | VEGAN           | PV              |
| MFD               | -               | 0.0734          | 0.0937          | < <b>0.0001</b> | <b>0.0143</b>   | 0.2977          | <b>0.0444</b>   |
| FFD               | 0.0734          | -               | 0.9061          | < <b>0.0001</b> | 0.4880          | <b>0.0056</b>   | 0.8187          |
| BD                | 0.0937          | 0.9061          | -               | < <b>0.0001</b> | 0.4175          | <b>0.0077</b>   | 0.7285          |
| RD                | < <b>0.0001</b> | < <b>0.0001</b> | < <b>0.0001</b> | -               | < <b>0.0001</b> | < <b>0.0001</b> | < <b>0.0001</b> |
| LOV               | <b>0.0143</b>   | 0.4880          | 0.4175          | < <b>0.0001</b> | -               | <b>0.0007</b>   | 0.6418          |
| VEGAN             | 0.2977          | <b>0.0056</b>   | <b>0.0077</b>   | < <b>0.0001</b> | <b>0.0007</b>   | -               | <b>0.0029</b>   |
| PV                | <b>0.0444</b>   | 0.8187          | 0.7285          | < <b>0.0001</b> | 0.6418          | <b>0.0029</b>   | -               |
| <b>IRON</b>       | MFD             | FFD             | BD              | RD              | LOV             | VEGAN           | PV              |
| MFD               | -               | <b>0.0009</b>   | <b>0.0014</b>   | < <b>0.0001</b> | <b>0.0044</b>   | <b>0.0484</b>   | <b>0.0009</b>   |
| FFD               | <b>0.0009</b>   | -               | 0.8963          | < <b>0.0001</b> | 0.6043          | < <b>0.0001</b> | 0.9778          |
| BD                | <b>0.0014</b>   | 0.8963          | -               | < <b>0.0001</b> | 0.6979          | < <b>0.0001</b> | 0.8743          |
| RD                | < <b>0.0001</b> | < <b>0.0001</b> | < <b>0.0001</b> | -               | < <b>0.0001</b> | < <b>0.0001</b> | < <b>0.0001</b> |
| LOV               | <b>0.0044</b>   | 0.6043          | 0.6979          | < <b>0.0001</b> | -               | < <b>0.0001</b> | 0.5851          |
| VEGAN             | <b>0.0484</b>   | < <b>0.0001</b> | < <b>0.0001</b> | < <b>0.0001</b> | < <b>0.0001</b> | -               | < <b>0.0001</b> |

|                  |                   |                   |                   |                   |                   |                   |                   |
|------------------|-------------------|-------------------|-------------------|-------------------|-------------------|-------------------|-------------------|
| PV               | <b>0.0009</b>     | 0.9778            | 0.8743            | <b>&lt;0.0001</b> | 0.5851            | <b>&lt;0.0001</b> | -                 |
| <b>ZINC</b>      | MFD               | FFD               | BD                | RD                | LOV               | VEGAN             | PV                |
| MFD              | -                 | 0.2353            | 0.4921            | <b>0.0357</b>     | 0.2599            | 0.5072            | 0.3442            |
| FFD              | 0.2353            | -                 | 0.6136            | <b>0.0014</b>     | 0.9512            | 0.5971            | 0.8070            |
| BD               | 0.4921            | 0.6136            | -                 | <b>0.0061</b>     | 0.6572            | 0.9810            | 0.7942            |
| RD               | <b>0.0357</b>     | <b>0.0014</b>     | <b>0.0061</b>     | -                 | <b>0.0017</b>     | <b>0.0065</b>     | <b>0.0029</b>     |
| LOV              | 0.2599            | 0.9512            | 0.6572            | <b>0.0017</b>     | -                 | 0.6401            | 0.8546            |
| VEGAN            | 0.5072            | 0.5971            | 0.9810            | <b>0.0065</b>     | 0.6401            | -                 | 0.7759            |
| PV               | 0.3442            | 0.8070            | 0.7942            | <b>0.0029</b>     | 0.8546            | 0.7759            | -                 |
| <b>COPPER</b>    | MFD               | FFD               | BD                | RD                | LOV               | VEGAN             | PV                |
| MFD              | -                 | <b>0.0466</b>     | <b>0.0383</b>     | <b>&lt;0.0001</b> | <b>0.0359</b>     | 0.0766            | 0.0738            |
| FFD              | <b>0.0466</b>     | -                 | 0.9314            | <b>&lt;0.0001</b> | 0.9090            | <b>0.0003</b>     | 0.8330            |
| BD               | <b>0.0383</b>     | 0.9314            | -                 | <b>&lt;0.0001</b> | 0.9775            | <b>0.0002</b>     | 0.7666            |
| RD               | <b>&lt;0.0001</b> | <b>&lt;0.0001</b> | <b>&lt;0.0001</b> | -                 | <b>&lt;0.0001</b> | <b>&lt;0.0001</b> | <b>&lt;0.0001</b> |
| LOV              | <b>0.0359</b>     | 0.9090            | 0.9775            | <b>&lt;0.0001</b> | -                 | <b>0.0002</b>     | 0.7452            |
| VEGAN            | 0.0766            | <b>0.0003</b>     | <b>0.0002</b>     | <b>&lt;0.0001</b> | <b>0.0002</b>     | -                 | <b>0.0006</b>     |
| PV               | 0.0738            | 0.8330            | 0.7666            | <b>&lt;0.0001</b> | 0.7452            | <b>0.0006</b>     | -                 |
| <b>MANGANESE</b> | MFD               | FFD               | BD                | RD                | LOV               | VEGAN             | PV                |
| MFD              | -                 | 0.2735            | 0.1858            | <b>&lt;0.0001</b> | 0.2128            | 0.1402            | 0.2799            |
| FFD              | 0.2735            | -                 | 0.8166            | <b>&lt;0.0001</b> | 0.8780            | <b>0.0116</b>     | 0.9882            |
| BD               | 0.1858            | 0.8166            | -                 | <b>&lt;0.0001</b> | 0.9374            | <b>0.0062</b>     | 0.8051            |
| RD               | <b>&lt;0.0001</b> | <b>&lt;0.0001</b> | <b>&lt;0.0001</b> | -                 | <b>&lt;0.0001</b> | <b>&lt;0.0001</b> | <b>&lt;0.0001</b> |
| LOV              | 0.2128            | 0.8780            | 0.9374            | <b>&lt;0.0001</b> | -                 | <b>0.0077</b>     | 0.8664            |
| VEGAN            | 0.1402            | <b>0.0116</b>     | <b>0.0062</b>     | <b>&lt;0.0001</b> | <b>0.0077</b>     | -                 | <b>0.0121</b>     |
| PV               | 0.2799            | 0.9882            | 0.8051            | <b>&lt;0.0001</b> | 0.8664            | <b>0.0121</b>     | -                 |
| <b>IODINE</b>    | MFD               | FFD               | BD                | RD                | LOV               | VEGAN             | PV                |
| MFD              | -                 | 0.1976            | 0.6870            | 0.0510            | <b>0.0440</b>     | <b>0.0083</b>     | 0.0583            |
| FFD              | 0.1976            | -                 | 0.3729            | <b>0.0016</b>     | 0.4543            | 0.1590            | 0.5333            |
| BD               | 0.6870            | 0.3729            | -                 | <b>0.0197</b>     | 0.1038            | <b>0.0234</b>     | 0.1326            |
| RD               | 0.0510            | <b>0.0016</b>     | <b>0.0197</b>     | -                 | <b>0.0001</b>     | <b>&lt;0.0001</b> | <b>0.0002</b>     |
| LOV              | <b>0.0440</b>     | 0.4543            | 0.1038            | <b>0.0001</b>     | -                 | 0.5038            | 0.8997            |
| VEGAN            | <b>0.0083</b>     | 0.1590            | <b>0.0234</b>     | <b>&lt;0.0001</b> | 0.5038            | -                 | 0.4274            |
| PV               | 0.0583            | 0.5333            | 0.1326            | <b>0.0002</b>     | 0.8997            | 0.4274            | -                 |

Table S2. The presence of statistically significant differences in the content of vitamins between the diets

|                |        |               |               |                   |               |               |               |
|----------------|--------|---------------|---------------|-------------------|---------------|---------------|---------------|
| <b>VIT.A</b>   | MFD    | FFD           | BD            | RD                | LOV           | VEGAN         | PV            |
| MFD            | -      | 0.6902        | 0.6224        | 0.0687            | 0.5298        | 0.7474        | 0.7684        |
| FFD            | 0.6902 | -             | 0.9250        | <b>0.0278</b>     | 0.8178        | 0.4718        | 0.9170        |
| BD             | 0.6224 | 0.9250        | -             | <b>0.0221</b>     | 0.8916        | 0.4162        | 0.8482        |
| RD             | 0.0687 | <b>0.0278</b> | <b>0.0221</b> | -                 | <b>0.0157</b> | 0.1313        | <b>0.0356</b> |
| LOV            | 0.5298 | 0.8178        | 0.8916        | <b>0.0157</b>     | -             | 0.3431        | 0.7380        |
| VEGAN          | 0.7474 | 0.4718        | 0.4162        | 0.1313            | 0.3431        | -             | 0.5380        |
| PV             | 0.7684 | 0.9170        | 0.8482        | <b>0.0356</b>     | 0.7380        | 0.5380        | -             |
| <b>RETINOL</b> | MFD    | FFD           | BD            | RD                | LOV           | VEGAN         | PV            |
| MFD            | -      | 0.1586        | 0.1634        | <b>&lt;0.0001</b> | <b>0.0077</b> | 0.2129        | 0.0552        |
| FFD            | 0.1586 | -             | 0.9867        | <b>&lt;0.0001</b> | 0.1888        | <b>0.0093</b> | 0.6005        |

|                          |         |         |         |         |         |         |         |
|--------------------------|---------|---------|---------|---------|---------|---------|---------|
| BD                       | 0.1634  | 0.9867  | -       | <0.0001 | 0.1834  | 0.0097  | 0.5890  |
| RD                       | <0.0001 | <0.0001 | <0.0001 | -       | 0.0002  | <0.0001 | <0.0001 |
| LOV                      | 0.0077  | 0.1888  | 0.1834  | 0.0002  | -       | 0.0002  | 0.4255  |
| VEGAN                    | 0.2129  | 0.0093  | 0.0097  | <0.0001 | 0.0002  | -       | 0.0021  |
| PV                       | 0.0552  | 0.6005  | 0.5890  | <0.0001 | 0.4255  | 0.0021  | -       |
| <b>BETA-CAROTEN E</b>    | MFD     | FFD     | BD      | RD      | LOV     | VEGAN   | PV      |
| MFD                      | -       | 0.8709  | 0.7916  | 0.0006  | 0.9690  | 0.9996  | 0.9290  |
| FFD                      | 0.8709  | -       | 0.9189  | 0.0003  | 0.9016  | 0.8705  | 0.7935  |
| BD                       | 0.7916  | 0.9189  | -       | 0.0002  | 0.8217  | 0.7912  | 0.7163  |
| RD                       | 0.0006  | 0.0003  | 0.0002  | -       | 0.0005  | 0.0006  | 0.0008  |
| LOV                      | 0.9690  | 0.9016  | 0.8217  | 0.0005  | -       | 0.9686  | 0.8901  |
| VEGAN                    | 0.9996  | 0.8705  | 0.7912  | 0.0006  | 0.9686  | -       | 0.9213  |
| PV                       | 0.9290  | 0.7935  | 0.7163  | 0.0008  | 0.8901  | 0.9213  | -       |
| <b>VIT.E</b>             | MFD     | FFD     | BD      | RD      | LOV     | VEGAN   | PV      |
| MFD                      | -       | 0.0158  | 0.0292  | <0.0001 | 0.0225  | 0.6782  | 0.0117  |
| FFD                      | 0.0158  | -       | 0.8045  | 0.0011  | 0.8882  | 0.0431  | 0.9089  |
| BD                       | 0.0292  | 0.8045  | -       | 0.0005  | 0.9147  | 0.0742  | 0.7175  |
| RD                       | <0.0001 | 0.0011  | 0.0005  | -       | 0.0007  | <0.0001 | 0.0016  |
| LOV                      | 0.0225  | 0.8882  | 0.9147  | 0.0007  | -       | 0.0590  | 0.7988  |
| VEGAN                    | 0.6782  | 0.0431  | 0.0742  | <0.0001 | 0.0590  | -       | 0.0331  |
| PV                       | 0.0117  | 0.9089  | 0.7175  | 0.0016  | 0.7988  | 0.0331  | -       |
| <b>THIAMIN</b>           | MFD     | FFD     | BD      | RD      | LOV     | VEGAN   | PV      |
| MFD                      | -       | 0.1775  | 0.2413  | 0.0470  | 0.0485  | 0.5150  | 0.0650  |
| FFD                      | 0.1775  | -       | 0.8570  | 0.5105  | 0.5193  | 0.0478  | 0.6090  |
| BD                       | 0.2413  | 0.8570  | -       | 0.4025  | 0.4102  | 0.0708  | 0.4896  |
| RD                       | 0.0470  | 0.5105  | 0.4025  | -       | 0.9891  | 0.0094  | 0.8830  |
| LOV                      | 0.0485  | 0.5193  | 0.4102  | 0.9891  | -       | 0.0097  | 0.8938  |
| VEGAN                    | 0.5150  | 0.0478  | 0.0708  | 0.0094  | 0.0097  | -       | 0.0138  |
| PV                       | 0.0650  | 0.6090  | 0.4896  | 0.8830  | 0.8938  | 0.0138  | -       |
| <b>RIBOFLAVIN</b>        | MFD     | FFD     | BD      | RD      | LOV     | VEGAN   | PV      |
| MFD                      | -       | 0.0133  | 0.0247  | 0.2294  | 0.0025  | 0.3320  | 0.0098  |
| FFD                      | 0.0133  | -       | 0.8071  | 0.0004  | 0.5447  | 0.0008  | 0.9062  |
| BD                       | 0.0247  | 0.8071  | -       | 0.0008  | 0.3963  | 0.0017  | 0.7175  |
| RD                       | 0.2294  | 0.0004  | 0.0008  | -       | <0.0001 | 0.8142  | 0.0003  |
| LOV                      | 0.0025  | 0.5447  | 0.3963  | <0.0001 | -       | 0.0001  | 0.6254  |
| VEGAN                    | 0.3320  | 0.0008  | 0.0017  | 0.8142  | 0.0001  | -       | 0.0005  |
| PV                       | 0.0098  | 0.9062  | 0.7175  | 0.0003  | 0.6254  | 0.0005  | -       |
| <b>NIACIN</b>            | MFD     | FFD     | BD      | RD      | LOV     | VEGAN   | PV      |
| MFD                      | -       | 0.0419  | 0.4278  | 0.0047  | <0.0001 | 0.0028  | 0.0001  |
| FFD                      | 0.0419  | -       | 0.2057  | 0.3969  | 0.0403  | 0.3056  | 0.0434  |
| BD                       | 0.4278  | 0.2057  | -       | 0.0369  | 0.0013  | 0.0241  | 0.0014  |
| RD                       | 0.0047  | 0.3969  | 0.0369  | -       | 0.2191  | 0.8579  | 0.2314  |
| LOV                      | <0.0001 | 0.0403  | 0.0013  | 0.2191  | -       | 0.2925  | 0.9739  |
| VEGAN                    | 0.0028  | 0.3056  | 0.0241  | 0.8579  | 0.2925  | -       | 0.3076  |
| PV                       | 0.0001  | 0.0434  | 0.0014  | 0.2314  | 0.9739  | 0.3076  | -       |
| <b>VIT.B<sub>6</sub></b> | MFD     | FFD     | BD      | RD      | LACTO   | VEGAN   | PV      |

|                |               |               |               |               |               |               |               |
|----------------|---------------|---------------|---------------|---------------|---------------|---------------|---------------|
| MFD            | -             | 0.1275        | 0.6135        | <0.0001       | <b>0.0181</b> | 0.1532        | <b>0.0120</b> |
| FFD            | 0.1275        | -             | 0.3037        | <0.0001       | 0.3811        | 0.9216        | 0.3007        |
| BD             | 0.6135        | 0.3037        | -             | <0.0001       | 0.0595        | 0.3518        | <b>0.0416</b> |
| RD             | <0.0001       | <0.0001       | <0.0001       | -             | <b>0.0005</b> | <0.0001       | <b>0.0009</b> |
| LOV            | 0.0181        | 0.3811        | 0.0595        | <b>0.0005</b> | -             | 0.3304        | 0.8723        |
| VEGAN          | 0.1532        | 0.9216        | 0.3518        | <0.0001       | 0.3304        | -             | 0.2577        |
| PV             | <b>0.0120</b> | 0.3007        | <b>0.0416</b> | <b>0.0009</b> | 0.8723        | 0.2577        | -             |
| <b>VIT.C</b>   | MFD           | FFD           | BD            | RD            | LOV           | VEGAN         | PV            |
| MFD            | -             | 0.7327        | 0.6378        | <0.0001       | 0.4287        | 0.9416        | 0.9266        |
| FFD            | 0.7327        | -             | 0.8970        | <0.0001       | 0.6518        | 0.7884        | 0.8029        |
| BD             | 0.6378        | 0.8970        | -             | <0.0001       | 0.7474        | 0.6909        | 0.7048        |
| RD             | <0.0001       | <0.0001       | <0.0001       | -             | <0.0001       | <0.0001       | <0.0001       |
| LOV            | 0.4287        | 0.6518        | 0.7474        | <0.0001       | -             | 0.4724        | 0.4840        |
| VEGAN          | 0.9416        | 0.7884        | 0.6909        | <0.0001       | 0.4724        | -             | 0.9850        |
| PV             | 0.9266        | 0.8029        | 0.7048        | <0.0001       | 0.4840        | 0.9850        | -             |
| <b>FOLATES</b> | MFD           | FFD           | BD            | RD            | LOV           | VEGAN         | PV            |
| MFD            | -             | 0.7323        | 0.8574        | <0.0001       | 0.7192        | 0.4556        | 0.9555        |
| FFD            | 0.7323        | -             | 0.8710        | <0.0001       | 0.4836        | 0.2780        | 0.7747        |
| BD             | 0.8574        | 0.8710        | -             | <0.0001       | 0.5900        | 0.3553        | 0.9014        |
| RD             | <0.0001       | <0.0001       | <0.0001       | -             | <0.0001       | <0.0001       | <0.0001       |
| LOV            | 0.7192        | 0.4836        | 0.5900        | <0.0001       | -             | 0.6981        | 0.6779        |
| VEGAN          | 0.4556        | 0.2780        | 0.3553        | <0.0001       | 0.6981        | -             | 0.4228        |
| PV             | 0.9555        | 0.7747        | 0.9014        | <0.0001       | 0.6779        | 0.4228        | -             |
| <b>VIT.B12</b> | MFD           | FFD           | BD            | RD            | LOV           | VEGAN         | PV            |
| MFD            | -             | <b>0.0259</b> | 0.3019        | 0.9989        | 0.0884        | <b>0.0032</b> | <b>0.0173</b> |
| FFD            | <b>0.0259</b> | -             | 0.2191        | <b>0.0260</b> | 0.5834        | 0.4371        | 0.8721        |
| BD             | 0.3019        | 0.2191        | -             | 0.3026        | 0.4927        | <b>0.0473</b> | 0.1655        |
| RD             | 0.9989        | <b>0.0260</b> | 0.3026        | -             | 0.0886        | <b>0.0032</b> | <b>0.0174</b> |
| LOV            | 0.0884        | 0.5834        | 0.4927        | 0.0886        | -             | 0.1872        | 0.4785        |
| VEGAN          | <b>0.0032</b> | 0.4371        | <b>0.0473</b> | <b>0.0032</b> | 0.1872        | -             | 0.5372        |
| PV             | <b>0.0173</b> | 0.8721        | 0.1655        | <b>0.0174</b> | 0.4785        | 0.5372        | -             |
| <b>VIT.D</b>   | MFD           | FFD           | BD            | RD            | LOV           | VEGAN         | PV            |
| MFD            | -             | <b>0.0072</b> | 0.4768        | 0.5363        | <b>0.0193</b> | <b>0.0075</b> | <b>0.0066</b> |
| FFD            | <b>0.0072</b> | -             | <b>0.0435</b> | <b>0.0351</b> | 0.7093        | 0.9912        | 0.9737        |
| BD             | 0.4768        | <b>0.0435</b> | -             | 0.9255        | 0.0968        | <b>0.0446</b> | <b>0.0404</b> |
| RD             | 0.5363        | <b>0.0351</b> | 0.9255        | -             | 0.0800        | <b>0.0360</b> | <b>0.0325</b> |
| LOV            | <b>0.0193</b> | 0.7093        | 0.0968        | 0.0800        | -             | 0.7175        | 0.6849        |
| VEGAN          | <b>0.0075</b> | 0.9912        | <b>0.0446</b> | <b>0.0360</b> | 0.7175        | -             | 0.9649        |
| PV             | <b>0.0066</b> | 0.9737        | <b>0.0404</b> | <b>0.0325</b> | 0.6849        | 0.9649        | -             |

bold– statistically significant differences
